# Supplementary material for: Spatial Transcriptomics in a Case of Follicular Thyroid Carcinoma Reveals Clone-Specific Dysregulation of Genes Regulating Extracellular Matrix in the Invading Front
Source: Endocr Pathol. 2024 Jan 27;35(2):122–33. doi: 10.1007/s12022-024-09798-0 (PMC11176252; doi:10.1007/s12022-024-09798-0)
Supplement: Supplementary file 3 — Supplementary file3 (XLSX 10 KB) [file 12022_2024_9798_MOESM3_ESM.xlsx]

## Sheet: Supplemental Table 1
Supplemental Table 1. Sequencing parameters details.
Summary	Slide 1	Slide 2	Slide 3	Slide 4
Number of spots under tissue	4.538	4.582	4.344	4.61
Mean reads per spot	57.621	58.417	80.182	59.772
Median genes per spot	6.86	8.338	7.302	8.299
Sequencing
Number of Reads	261,483,141	267,666,729	348,309,655	275,549,813
Valid Barcodes	99.0%	99.1%	99.0%	99.1%
Valid UMIs	100.0%	100.0%	100.0%	100.0%
Sequencing Saturation	59.6%	30.9%	66.9%	38.5%
Q30 Bases in Barcode	96.1%	96.0%	96.3%	96.0%
Q30 Bases in Probe Read	95.4%	94.5%	94.9%	95.3%
Q30 Bases in UMI	94.6%	94.4%	95.0%	94.6%
Mapping
Reads Mapped to Probe Set	95.5%	98.8%	98.5%	98.8%
Reads Mapped Confidently to Probe Set	97.8%	98.4%	98.1%	98.6%
Reads Mapped Confidently to the Filtered Probe Set	93.3%	92.9%	94.5%	94.0%
Spots
Fraction Reads in Spots Under Tissue	99.1%	98.0%	99.8%	99.2%
Mean Reads per Spot	57.621	58.417	80.182	59.772
Mean Reads Under Tissue per Spot	56.486	56.695	79.215	58.787
Median UMI Counts per Spot	21.854	33.944	24.784	58.625
Median Genes per Spot	6.86	8.338	7.032	8.299
Genes Detected	18.053	18.057	18.052	18.055
