# Supplementary material for: Spatial Transcriptomics in a Case of Follicular Thyroid Carcinoma Reveals Clone-Specific Dysregulation of Genes Regulating Extracellular Matrix in the Invading Front
Source: Endocr Pathol. 2024 Jan 27;35(2):122–33. doi: 10.1007/s12022-024-09798-0 (PMC11176252; doi:10.1007/s12022-024-09798-0)
Supplement: Supplementary file 5 — Supplementary file5 (XLSX 11 KB) [file 12022_2024_9798_MOESM5_ESM.xlsx]

## Sheet: Supplemental Table 3
Supplemental Table 3. Differentially enriched gene sets between Early vs Late tumor cells.
Gene set ID	Gene set description	Gene set size	Enrichment score (EARLY vs LATE)	Normalized enrichment score (EARLY vs LATE)	P-value (EARLY vs LATE)	FDR (EARLY vs LATE)	Leading edge size (EARLY vs LATE)
path:hsa04512	ECM-receptor interaction	45	-0.5919634384110503E0	-2.029747149134584E0	0.0E0	0.0E0	27
path:hsa04974	Protein digestion and absorption	32	-0.7270056365226939E0	-2.285234439696629E0	0.0E0	0.0E0	21
path:hsa04928	Parathyroid hormone synthesis, secretion and action	55	-0.4914031846223428E0	-1.913190871508272E0	0.0E0	0.04607728009841485E0	19
path:hsa05144	Malaria	14	-0.7290797714261252E0	-1.87144373854506E0	0.0E0	0.05183694011071686E0	10
path:hsa00920	Sulfur metabolism	7	-0.7299426252918452E0	-1.850008745025012E0	0.0E0	0.0518369401107183E0	5
path:hsa04514	Cell adhesion molecules	39	-0.5136001191353544E0	-1.827959960107821E0	0.0E0	0.05471677011686907E0	22
path:hsa04371	Apelin signaling pathway	68	-0.4136269886964037E0	-1.773938768678512E0	0.0E0	0.07103580681839242E0	18
path:hsa04933	AGE-RAGE signaling pathway in diabetic complications	62	-0.4409277370214259E0	-1.778380634499176E0	0.0E0	0.07775541016607923E0	14
path:hsa05323	Rheumatoid arthritis	25	-0.5460192848538823E0	-1.752328954463145E0	0.0E0	0.07775541016608115E0	11
path:hsa05224	Breast cancer	69	-0.4116637080008838E0	-1.735256735552672E0	0.0E0	0.08207515517530646E0	21
path:hsa04510	Focal adhesion	131	-0.3968839368178041E0	-1.739925762168467E0	0.0E0	0.08482408381754102E0	32
path:hsa05031	Amphetamine addiction	29	-0.5249703309475495E0	-1.780331991079413E0	0.0E0	0.08886332590409082E0	3
path:hsa05222	Small cell lung cancer	60	-0.4364181386076951E0	-1.7208965015504E0	0.0E0	0.09038235711612656E0	35
